# Supplementary material for: Occurrence of Ergot Alkaloids in Barley and Wheat from Algeria
Source: MDPI journal article supplement (doi:10.3390/toxins13050316), 2021-04-28
Supplement: s1 [file s1]

# Occurrence of Ergot Alkaloids in Barley and Wheat from Algeria

Laura Carbonell-Rozas, Choukri Khelifa Mahdjoubi, Natalia Arroyo-Manzanares, Ana M. García-Campaña and Laura Gámiz-Gracia

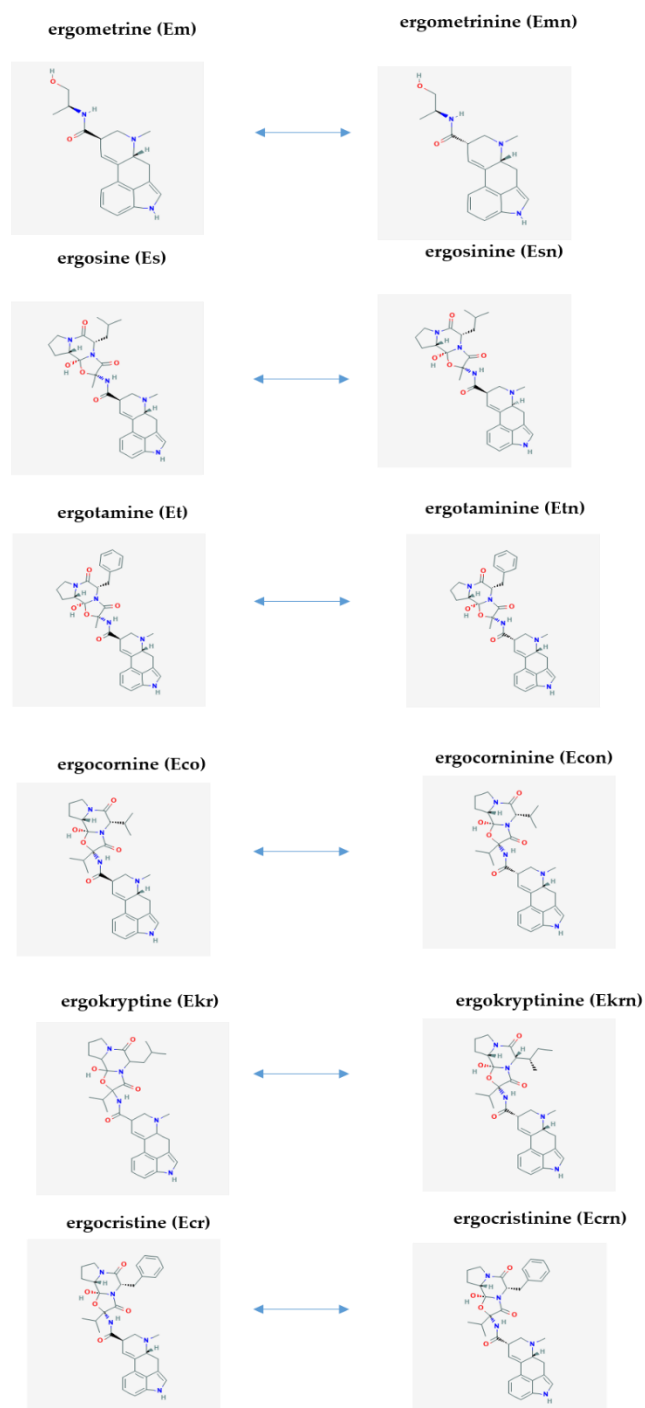

**Figure S1.** Chemical structures of the studied ergot alkaloids.

**Table S1.** Results of positive samples (concentration of EA higher than LOD, n=9). <LOQ: concentration below the LOQ for the EA (detected but not quantified, concentration considered as equal to zero).

| BARLEY  |                        |                       |      |
|---------|------------------------|-----------------------|------|
| Sample* | Ergot Alkaloid         | Concentration (µg/kg) | %RSD |
| T1      | Em                     | 30.4                  | 2.2  |
|         | Emn                    | <LOQ                  | ---  |
|         | Et                     | 2.8                   | 0.4  |
|         | <b>Total EAs (T1)</b>  | <b>33.2</b>           |      |
| T3      | Em                     | 50.0                  | 2.5  |
|         | Emn                    | <LOQ                  | ---  |
|         | Et                     | 3.9                   | 0.5  |
|         | <b>Total EAs (T3)</b>  | <b>53.9</b>           |      |
| T7      | Em                     | 34.2                  | 2.2  |
|         | Emn                    | <LOQ                  | ---  |
|         | Et                     | 2.34                  | 0.3  |
|         | <b>Total EAs (T7)</b>  | <b>36.5</b>           |      |
| T10     | Em                     | 17.8                  | 1.4  |
|         | Emn                    | <LOQ                  | ---  |
|         | <b>Total EAs (T10)</b> | <b>17.8</b>           |      |

**Table S1. (cont.)** Results of positive samples (concentration of EA higher than LOD, n=9). <LOQ: concentration below the LOQ for the EA (detected but not quantified, concentration considered as equal to zero).

| WHEAT   |                       |                       |      |
|---------|-----------------------|-----------------------|------|
| Sample* | Ergot Alkaloid        | Concentration (µg/kg) | %RSD |
| O2      | Em                    | 13.6                  | 1.3  |
|         | <b>Total EAs (O2)</b> | <b>13.6</b>           |      |
| T8      | Em                    | 24.9                  | 1.2  |
|         | Emn                   | 1.42                  | 0.2  |
|         | Es                    | 0.62                  | 0.1  |
|         | Et                    | 3.71                  | 0.6  |
|         | Eco                   | <LOQ                  | ---  |
|         | Econ                  | <LOQ                  | ---  |
|         | Ekr                   | 17.7                  | 1.9  |
|         | Ekrn                  | 3.45                  | 0.3  |
|         | Ecr                   | 16.1                  | 1.0  |
|         | Ecrn                  | 8.03                  | 0.2  |
|         | <b>Total EAs (T8)</b> | <b>76.0</b>           |      |
| O7      | Es                    | 1.66                  | 0.9  |
|         | Esn                   | <LOQ                  | ---  |
|         | Eco                   | 8.68                  | 1.3  |
|         | Econ                  | 3.84                  | 1.2  |
|         | Ekr                   | 13.2                  | 0.4  |
|         | Ekrn                  | 3.28                  | 1.0  |
|         | <b>Total EAs (O7)</b> | <b>30.7</b>           |      |
| AT1     | Em                    | <LOQ                  | ---  |
|         | Emn                   | <LOQ                  | ---  |

|     |                        |             |     |
|-----|------------------------|-------------|-----|
|     | Es                     | 1.61        | 0.4 |
|     | Esn                    | <LOQ        | --- |
|     | Et                     | 1.15        | 0.3 |
|     | Ekr                    | 4.76        | 0.8 |
|     | Ekrn                   | <LOQ        | --- |
|     | Ecr                    | 2.54        | 0.3 |
|     | <b>Total EAs (AT1)</b> | <b>10.1</b> |     |
| T9  | Em                     | <LOQ        | --- |
|     | Ekr                    | 1.56        | 0.2 |
|     | Ekrn                   | <LOQ        | --- |
|     | Ecr                    | 2.10        | 0.3 |
|     | Ecrn                   | <LOQ        | --- |
|     | <b>Total EAs (T9)</b>  | <b>3.66</b> |     |
| O4  | Em                     | 11.78       | 1.5 |
|     | Emn                    | <LOQ        | --- |
|     | Es                     | 1.30        | 0.2 |
|     | Ecr                    | 2.75        | 0.3 |
|     | Ecrn                   | 1.50        | 0.1 |
|     | <b>Total EAs (O4)</b>  | <b>17.3</b> |     |
| T10 | Em                     | 3.52        | 0.8 |
|     | Emn                    | <LOQ        | --- |
|     | Et                     | 13.6        | 1.3 |
|     | Etn                    | 2.91        | 0.7 |
|     | Ecr                    | 28.6        | 1.0 |
|     | Ecrn                   | 12.2        | 0.5 |
|     | <b>Total EAs (T10)</b> | <b>60.8</b> |     |
|     | Es                     | 3.3         | 0.9 |
|     | Esn                    | <LOQ        | --- |
|     | Eco                    | 12.4        | 1.5 |
|     | Econ                   | 4.9         | 0.8 |
|     | Ekr                    | 26.2        | 0.9 |
|     | Ekrn                   | 5.88        | 1.6 |
|     | <b>Total EAs (O10)</b> | <b>52.7</b> |     |

\*Sample code: A: samples from Aint Temouchent; O: samples from Oran; T: samples from Tiaret.

**Table S2.** MS parameters for the different ergot alkaloids studied in the proposed UHPLC-MS/MS method. .

|                  | Retention<br>time (min) | Precursor<br>ion (m/z) | Molecular<br>ion                    | DP <sup>a</sup> | EP <sup>a</sup> | Product<br>ions <sup>b</sup> | CE <sup>a</sup> | CXP <sup>a</sup> |
|------------------|-------------------------|------------------------|-------------------------------------|-----------------|-----------------|------------------------------|-----------------|------------------|
| <b>Em</b>        | 0.49                    | 326.0                  | [M+H] <sup>+</sup>                  | 51              | 5.0             | 223.0 (Q)                    | 23              | 4.0              |
|                  |                         |                        |                                     |                 |                 | 208.1 (I)                    | 37              | 4.0              |
| <b>Emn</b>       | 0.80                    | 326.0                  | [M+H] <sup>+</sup>                  | 46              | 6.0             | 208.1 (Q)                    | 39              | 6.0              |
|                  |                         |                        |                                     |                 |                 | 223.1 (I)                    | 33              | 6.0              |
| <b>Es</b>        | 3.82                    | 548.2                  | [M+H] <sup>+</sup>                  | 61              | 5.0             | 208.2 (Q)                    | 57              | 4.0              |
|                  |                         |                        |                                     |                 |                 | 223.1 (I)                    | 45              | 8.0              |
| <b>Esn</b>       | 3.56                    | 530.2                  | [M-H <sub>2</sub> O+H] <sup>+</sup> | 66              | 6.5             | 223.2 (Q)                    | 37              | 6.0              |
|                  |                         |                        |                                     |                 |                 | 263.1 (I)                    | 33              | 6.0              |
| <b>Et</b>        | 4.24                    | 582.2                  | [M+H] <sup>+</sup>                  | 56              | 7.0             | 208.2 (Q)                    | 55              | 4.0              |
|                  |                         |                        |                                     |                 |                 | 223.2 (I)                    | 45              | 4.0              |
| <b>Etn</b>       | 4.08                    | 564.2                  | [M-H <sub>2</sub> O+H] <sup>+</sup> | 66              | 6.0             | 223.0 (Q)                    | 41              | 6.0              |
|                  |                         |                        |                                     |                 |                 | 297.1 (I)                    | 33              | 6.0              |
| <b>Eco</b>       | 4.18                    | 562.2                  | [M+H] <sup>+</sup>                  | 46              | 4.5             | 268.1 (Q)                    | 33              | 6.0              |
|                  |                         |                        |                                     |                 |                 | 208.2 (I)                    | 55              | 4.0              |
| <b>Eco<br/>n</b> | 5.19                    | 544.2                  | [M-H <sub>2</sub> O+H] <sup>+</sup> | 61              | 8.5             | 277.1 (Q)                    | 31              | 6.0              |
|                  |                         |                        |                                     |                 |                 | 223.1 (I)                    | 37              | 6.0              |
| <b>Ekr</b>       | 5.24                    | 576.2                  | [M+H] <sup>+</sup>                  | 86              | 6.0             | 208.3 (Q)                    | 59              | 6.0              |
|                  |                         |                        |                                     |                 |                 | 268.1 (I)                    | 31              | 6.0              |
| <b>Ekr<br/>n</b> | 5.85                    | 576.2                  | [M-H <sub>2</sub> O+H] <sup>+</sup> | 36              | 7.0             | 223.0 (Q)                    | 45              | 6.0              |
|                  |                         |                        |                                     |                 |                 | 558.0 (I)                    | 21              | 6.0              |
| <b>Ecr</b>       | 5.44                    | 610.2                  | [M+H] <sup>+</sup>                  | 56              | 6.5             | 268.2 (Q)                    | 35              | 6.0              |
|                  |                         |                        |                                     |                 |                 | 208.1 (I)                    | 57              | 6.0              |
| <b>Ecrn</b>      | 6.08                    | 592.2                  | [M-H <sub>2</sub> O+H] <sup>+</sup> | 71              | 7.5             | 305.1 (Q)                    | 33              | 4.0              |
|                  |                         |                        |                                     |                 |                 | 223.2 (I)                    | 39              | 6.0              |

<sup>a</sup> Declustering potential (DP), Entrance potential (EP), Collision Cell Exit Potential (CXP) and Collision Energy (CE). All expressed in voltage. <sup>b</sup> Product ions: (Q) Transition used for quantification, (I) Transition employed to confirm the identification.
